# Supplementary material
Source: PubMed Central journal article supplement (PMC5672963)
Supplement: CJN.01180117SupplementaryData1.pdf [file CJN.01180117SupplementaryData1.pdf]

Supplemental material is neither peer-reviewed nor thoroughly edited by CJASN. The authors alone are responsible for the accuracy and presentation of the material.

## SUPPLEMENTAL MATERIAL

Supplementary Table 1: Baseline characteristics of AASK participants with *APOL1* genotyping: 1) included in study population (n=480), 2) excluded from present analysis due to prevalent proteinuria or missing proteinuria data at baseline (n=213).

| Characteristic                            | Study Population<br>(n=480) | Excluded from analyses<br>(n=213) | P-value |
|-------------------------------------------|-----------------------------|-----------------------------------|---------|
| Age at randomization, years               | 55.8 ± 9.6                  | 50.2 ± 11.6                       | <0.01   |
| Female                                    | 194 (40%)                   | 84 (39%)                          | 0.87    |
| <i>APOL1</i> high-risk status             | 82 (17%)                    | 78 (37%)                          | <0.01   |
| European ancestry, %                      | 16.6 ± 13.7                 | 16.8 ± 12.3                       | 0.81    |
| Current smoker                            | 131 (27%)                   | 64 (30%)                          | 0.47    |
| Systolic blood pressure, mmHg             | 148 ± 24                    | 156 ± 23                          | <0.01   |
| Body mass index, kg/m <sup>2</sup>        | 30.7 ± 6.6                  | 32.0 ± 6.8                        | 0.02    |
| Baseline eGFR, ml/min/1.73 m <sup>2</sup> | 52.6 ± 13.4                 | 40.4 ± 13.5                       | <0.01   |
| Total cholesterol, mg/dL                  | 211 ± 43                    | 212 ± 47                          | 0.73    |
| High-density lipoprotein, mg/dL           | 48 ± 16                     | 47 ± 15                           | 0.39    |
| Serum albumin, g/dL                       | 4.3 ± 0.3                   | 4.1 ± 0.3                         | <0.01   |
| Urine protein, g/g Cr                     | 0.04 (0.02 to 0.08)         | 0.64 (0.36 to 1.31)               | <0.01   |
| Urine sodium, g/day                       | 3.4 (2.2 to 4.5)            | 3.8 (2.5 to 5.0)                  | 0.02    |
| Randomized blood pressure goal            |                             |                                   | 1.00    |
| Low                                       | 243 (51%)                   | 108 (51%)                         |         |
| Usual                                     | 237 (49%)                   | 105 (49%)                         |         |
| Randomized blood pressure drug            |                             |                                   | 0.84    |
| Metoprolol                                | 191 (40%)                   | 80 (38%)                          |         |
| Ramipril                                  | 198 (41%)                   | 92 (43%)                          |         |
| Amlodipine                                | 91 (19%)                    | 41 (19%)                          |         |

Values presented as mean ± standard deviation, median (interquartile range), or n (%)

Abbreviations: eGFR=estimated glomerular filtration rate.

*APOL1* high-risk defined as having 2 risk alleles and low-risk defined as having 0-1 risk alleles.
